# Supplementary material for: Interfacial nanodroplets guided construction of hierarchical Au, Au-Pt, and Au-Pd particles as excellent catalysts
Source: PubMed Central journal article supplement — Sci Rep. 2014 May 6;4:4849. doi: 10.1038/srep04849 (PMC4010925; doi:10.1038/srep04849), 2014-05-06
Supplement: srep04849-s1.pdf [file srep04849-s1.pdf]

## Supplementary information

# **Interfacial nanodroplets guided construction of hierarchical porous Au, Au-Pt, and Au-Pd particles as excellent catalysts**

Aijing Ma<sup>1</sup>, Jie Xu<sup>1</sup>, Xuehua Zhang<sup>2,3</sup>, Bin Zhang<sup>4</sup>, Dayang Wang<sup>1</sup> & Haolan Xu<sup>1</sup>

<sup>1</sup>Ian Wark Research Institute, University of South Australia, Mawson Lakes Campus, SA 5095, Australia

<sup>2</sup>Department of Chemical and Biomolecular Engineering, University of Melbourne, Parkville VIC 3010, Australia

<sup>3</sup>School of Chemistry, University of Melbourne, Parkville, VIC 3010, Australia

<sup>4</sup>Department of Chemistry, Tianjin University, Tianjin, China

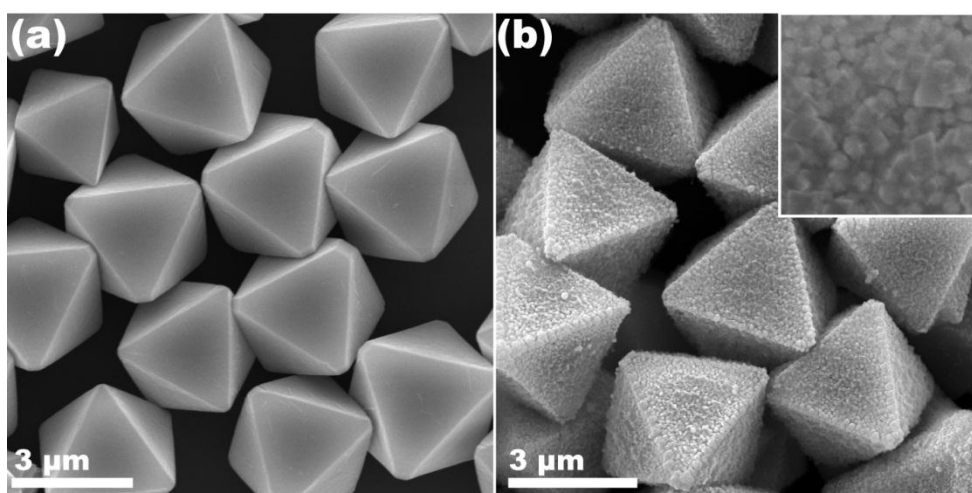

**Figure S1** | SEM image of (a) the hard template particles of  $\text{Cu}_2\text{O}$  octahedra, (b) Au nanoparticles coated  $\text{Cu}_2\text{O}$  octahedra after galvanic reaction between  $\text{Cu}_2\text{O}$  and  $\text{AuCl}_4^-$  in water (upper inset the surface feature of  $\text{Cu}_2\text{O}$ -Au particle).

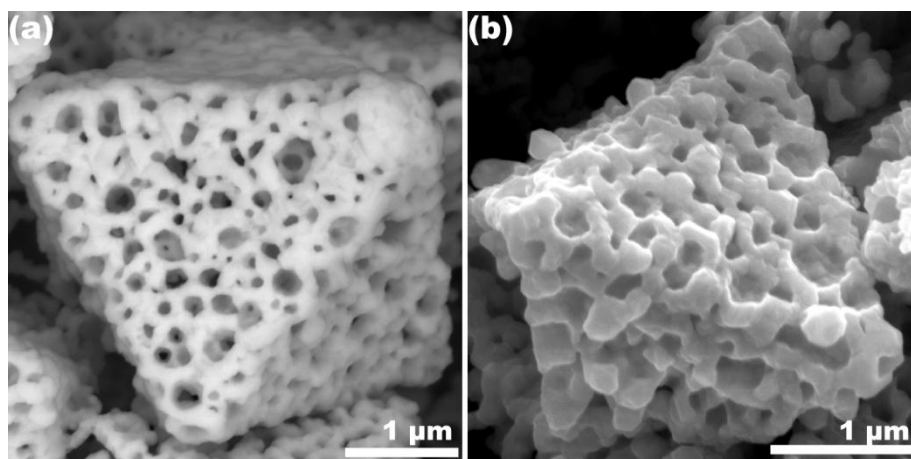

**Figure S2** | SEM images of the porous Au particles obtained via galvanic reaction between  $\text{Cu}_2\text{O}$  particles and  $\text{AuCl}_4^-$  with the presence of emulsion droplets: (a) A close view of the 3D porous Au particles, (b) a cracked porous Au particle.

Results

|                   | Size (d.nm...) | % Intensity   | Width (d.n... |       |
|-------------------|----------------|---------------|---------------|-------|
| Z-Average (d.nm): | 145.7          | Peak 1: 152.6 | 100.0         | 33.10 |
| Pdl:              | 0.033          | Peak 2: 0.000 | 0.0           | 0.000 |
| Intercept:        | 0.968          | Peak 3: 0.000 | 0.0           | 0.000 |

Result quality **Good**

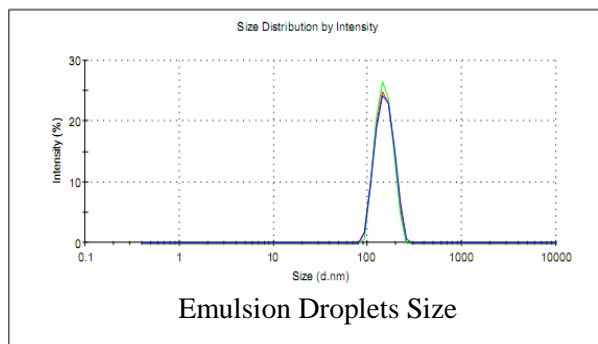

Figure S3| DLS size of the as-prepared surfactant free emulsion droplets.

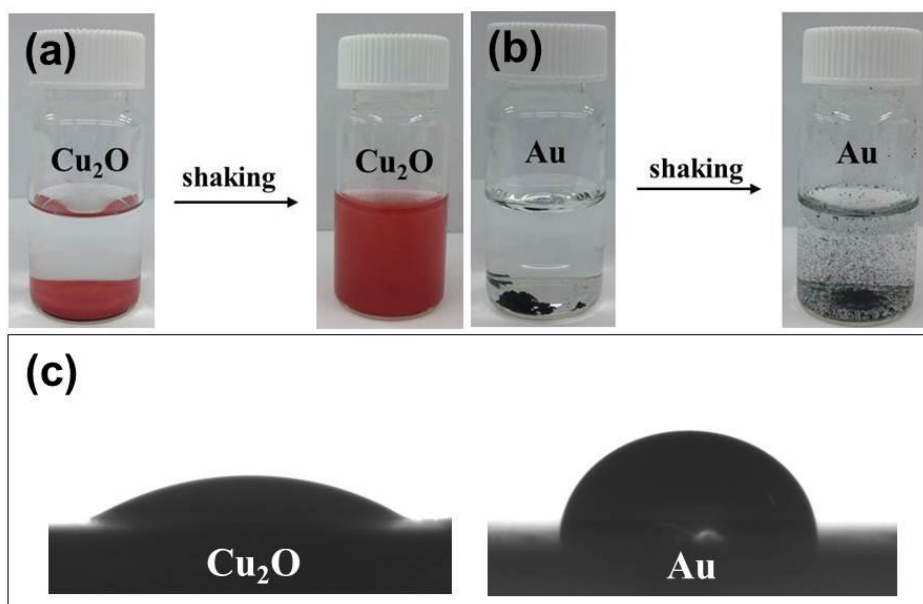

**Figure S4** | Photographs of the suspensions of (a) Cu<sub>2</sub>O and (b) as-formed Au particles via galvanic reaction. Cu<sub>2</sub>O particles could be dispersed in water by shaking while Au particles are heavily aggregated, implying Au is relatively hydrophobic while Cu<sub>2</sub>O is relatively hydrophilic. Optical images (c) of water droplet at the surface of Cu<sub>2</sub>O (left) and Au (right) layer in the air. The estimated contact angle of the droplets was  $\sim 31^\circ$  for Cu<sub>2</sub>O and  $\sim 89^\circ$  for Au surface, respectively.

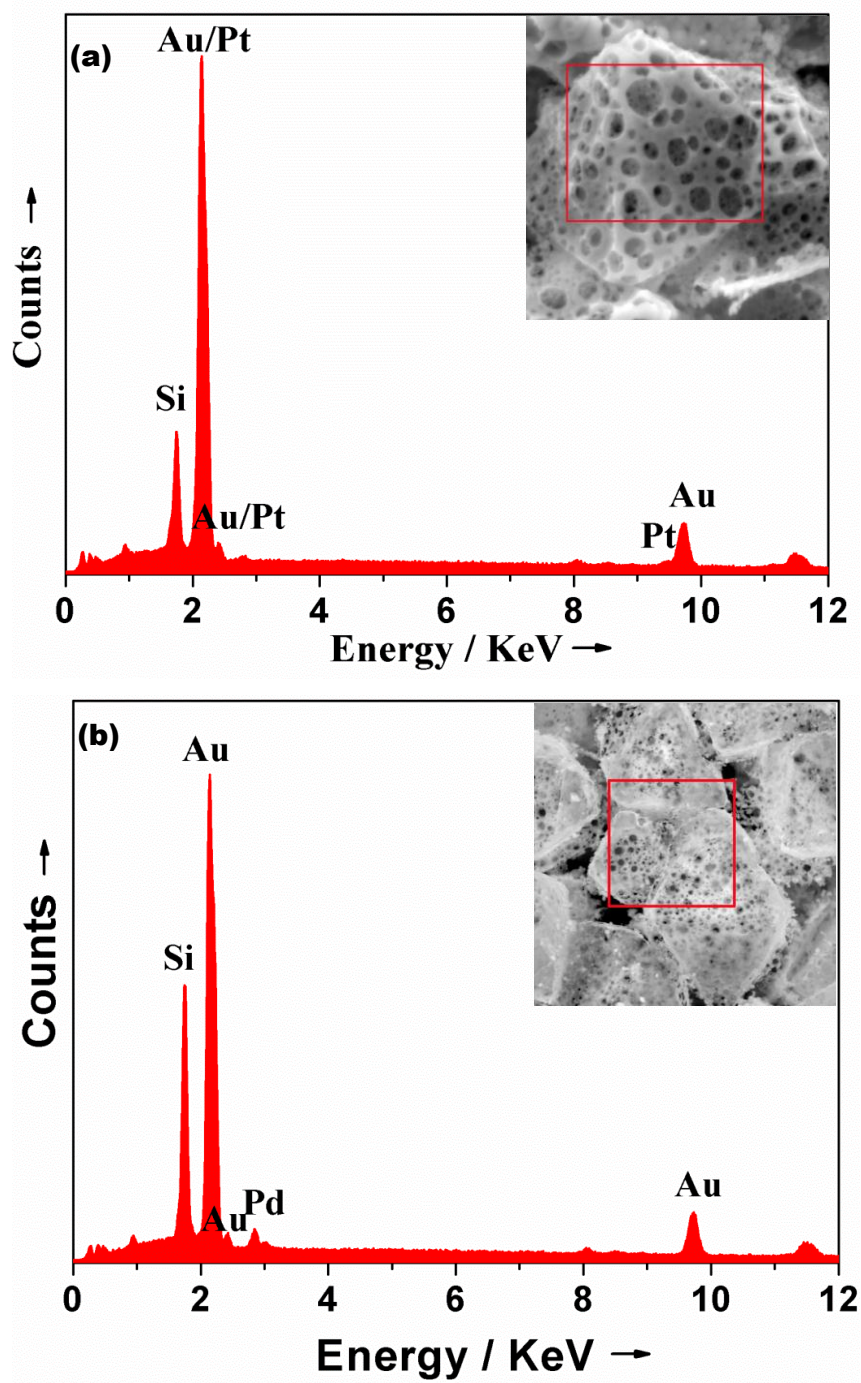

**Figure S5** | EDX spectra of (a) Au-Pt porous particles, the atomic ratio of Au:Pt is measured as ~10:1

(b) Au-Pd porous particles, the atomic ratio of Au:Pd is about ~13:1.

|              | $k_a$ (min <sup>-1</sup> ) (292 K) | $k_a$ (min <sup>-1</sup> ) (298 K) | $k_a$ (min <sup>-1</sup> ) (302 K) |
|--------------|------------------------------------|------------------------------------|------------------------------------|
| Porous Au    | 0.55                               | 0.75                               | 0.87                               |
| Porous Au-Pt | 2.50                               | 3.30                               | 3.75                               |
| Porous Au-Pd | 3.09                               | 4.01                               | 4.52                               |

**Table S1**| Summary of the reaction rate constant ( $K_a$ ) at temperature of 292, 298 and 302 K with the porous Au, Au-Pt and Au-Pd particles as catalyst.
